# Supplementary material for: ABLE-SCORE, a simplified risk score for major adverse cardiovascular outcomes in left ventricular noncompaction: a multicenter longitudinal cohort study
Source: Research Square preprint supplement (doi:10.21203/rs.3.rs-4028034/v1), 2024-03-13
Supplement: Supplementary file 1 [file 0384a42cb072cc4d1554dd81.docx]

**Supplementary Table S2 Incidence of MACE in the LVNC cohort**

| **Clinical Outcomes** | **Model**  **Derivation**  **Cohort**  **(N = 300)** | **Internal**  **Validation**  **Cohort**  **(N = 129)** | **External**  **Validation**  **Cohort**  **(N = 95)** |
| --- | --- | --- | --- |
| **MACE** | 97 (32.3%) | 38 (29.5%) | 20 (21.1%) |
| All-Cause Mortality | 54 (18.0%) | 23 (17.8%) | 11 (11.6%) |
| Heart Transplantation/LVAD Implantation | 21 (7.0%) | 7 (5.4%) | 1 (1.1%) |
| CRT Implantation | 15 (5.0%) | 6 (4.7%) | 5 (5.3%) |
| Aborted SCD/Ventricular Fibrillation | 9 (3.0%) | 5 (3.9%) | 1 (1.1%) |
| Sustained Ventricular Tachycardia | 16 (5.3%) | 9 (7.0%) | 2 (2.1%) |
| appropriate ICD Therapy | 7 (2.3%) | 5 (3.9%) | 2 (2.1%) |
| Systemic Thromboembolism | 6 (2.0%) | 3 (2.3%) | 3 (3.2%) |

LVNC, left ventricular noncompaction; MACE, major adverse cardiovascular event; LVAD, left ventricular assist device; CRT, cardiac resynchronization therapy; SCD, sudden cardiac death; and ICD, implantable cardioverter defibrillator.
