# Supplementary material for: ABLE-SCORE, a simplified risk score for major adverse cardiovascular outcomes in left ventricular noncompaction: a multicenter longitudinal cohort study
Source: Research Square preprint supplement (doi:10.21203/rs.3.rs-4028034/v1), 2024-03-13
Supplement: Supplementary file 2 [file a72e8bd503430eb6e6c0bcd1.docx]

**Supplementary Table S1 Regression coefficients and score points of the risk factors for MACE in LVNC**

| **Risk Factors** | **Categories** | **Reference Value (Wij)** | **Regression Coefficient (βi)** | **Points** |
| --- | --- | --- | --- | --- |
| Age at Diagnosis (years) | ≤10 | 5.5=W1REF | 0.015 | 0 |
|  | 11-20 | 15.5 |  | 1 |
|  | 21-30 | 25.5 |  | 2 |
|  | 31-40 | 35.5 |  | 3 |
|  | 41-50 | 45.5 |  | 4 |
|  | 51-60 | 55.5 |  | 5 |
|  | 61-70 | 65.5 |  | 6 |
|  | 71-80 | 75.5 |  | 7 |
|  | >80 | 85.5 |  | 8 |
| NT-pro BNP <300 pg/mL, *n* (%) | No | 0=W2REF | reference | 0 |
|  | Yes | 1 |  | 0 |
| NT-pro BNP 300-1000 pg/mL, *n* (%) | No | 0=W2REF | 0.762 | 0 |
|  | Yes | 1 |  | 5 |
| NT-pro BNP >1000 pg/mL, *n* (%) | No | 0=W2REF | 1.539 | 0 |
|  | Yes | 1 |  | 10 |
| LA Enlargement, *n* (%) | No | 0=W3REF | 0.648 | 0 |
|  | Yes | 1 |  | 4 |
| LVEF≤40%, *n* (%) | No | 0=W4REF | 0.539 | 0 |
|  | Yes | 1 |  | 4 |

LVNC, left ventricular noncompaction; MACE, major adverse cardiovascular event; NT-pro BNP, N-terminal pro-brain natriuretic peptide; LA, left atrium; LVEF, left ventricular ejection fraction; and REF, reference. Points=βi(Wij-WiREF)/10/0.015.

A risk scoring system (the ABLE-SCORE) was established based on regression coefficients of the risk factors in the final multivariable Cox regression predictive model according to procedures by Wilson et al [28]. The risk of MACE for LVNC patients was calculated using the following equation:

P (MACE at time *t*) = 1-S0 (*t*) exp (Σβixi − Σβixˉi)

S0 (*t*) is the baseline survival probability at time *t* (i.e. at 5 years). Σβixi and Σβixˉi were calculated by summing up the products of the regression coefficients of each predictor (βi), the individual values (xi), and the mean values (xˉi), respectively.

For the multivariable Cox regression predictive model, Σβixi = 0.015 age + 0 (if NT-pro BNP <300 pg/mL) + 0.762 (if NT-pro BNP 300-1000 pg/mL) + 1.539 (if NT-pro BNP >1000 pg/mL) + 0.648 (if has left atrium enlargement) + 0.539 (if LVEF≤40%). ΣβixˉI = βi Meani or Proportioni = 0.015 42.5 + 0 0.32 + 0.762 0.19 + 1.539 0.49 + 0.648 0.56 + 0.539 0.53 = 2.185. The baseline survival probability at 5 years is 0.735. Therefore, P (MACE at *5 years*) = 1-0.735exp (Σβixi – 2.185). For the risk scoring system (the ABLE-SCORE), Σβixi = 0.015 5.5 + 10 0.015 Total Score. Therefore, P (MACE at *5 years*) = 1-0.735exp (0.15*Total Score-2.102).

Example: consider a male LVNC patient, 56 years of age at diagnosis, with NT-pro BNP levels of 500 pg/mL, left atrium enlargement, and LVEF of 38%. Based on the multivariable Cox regression model, the calculated 5-year risk of MACE is 43.06%. According to the ABLE-SCORE, total score = 56 years of age at diagnosis (5 points) + NT-pro BNP levels of 500 pg/mL (5 points) + left atrium enlargement (4 points) + LVEF of 38% (4 points) = 18 points, which confers a 42.87% chance of developing MACE over 5 years. The risk of MACE estimated by the multivariable Cox regression model and the ABLE-SCORE is relatively similar.
